# Supplementary material
Source: PubMed Central journal article supplement (PMC6946863)
Supplement: NIHMS1540817-supplement-2.pdf [file NIHMS1540817-supplement-2.pdf]

**Supplementary Table 1. Description of objectives used for two-photon imaging.**

| <b>Objective</b>                                    | <b>Brief description</b>                                                                                                                                  |
|-----------------------------------------------------|-----------------------------------------------------------------------------------------------------------------------------------------------------------|
| Mitutoyo M Plan Apo NIR 20x<br>0.40 NA, 20mm WD     | Objective used for this study.                                                                                                                            |
| Mitutoyo M Plan Apo NIR B 20x<br>0.40 NA, 25.5mm WD | Improved near-IR transmission and larger back aperture. Not commercially available at time of study initiation. Superior sample brightness through prism. |
| Mitutoyo M Plan Apo NIR LCD<br>20x 0.40 NA, 20mm WD | Corrected for imaging through 1.1mm thick glass. Not commercially available at time of study initiation. Superior sample brightness through prism.        |
| Edmund Optics HR 20x 0.60 NA<br>13mm WD             | Superior sample sharpness but was not used due to concerns about shorter working distance.                                                                |
| Nikon L Plan SLWD 20x 0.35 NA<br>24mm WD            | Objective used in (Lecoq et al, 2014). Inferior sample brightness through prism, but very small and lightweight.                                          |
